# Supplementary material
Source: Springer Nature journal article supplement (https://www.springermedizin.de/resource/supplementary/12990_2008_124_MOESM8_ESM.pdf/9612750)

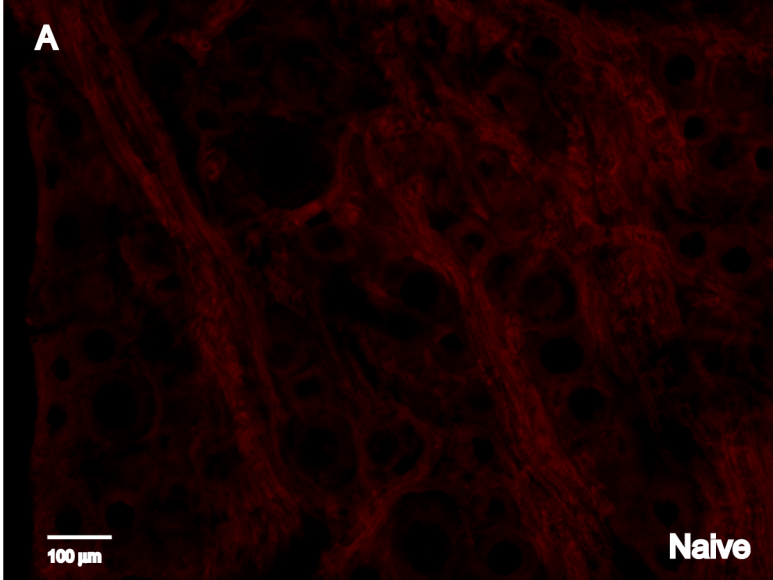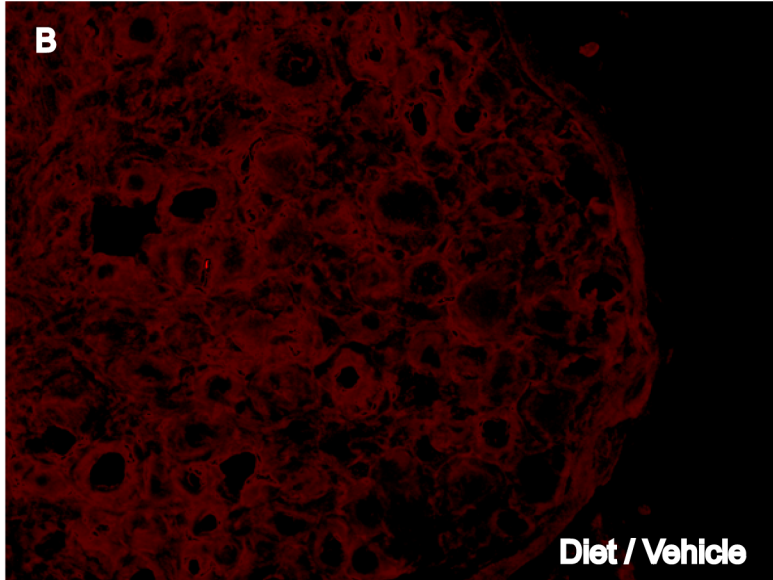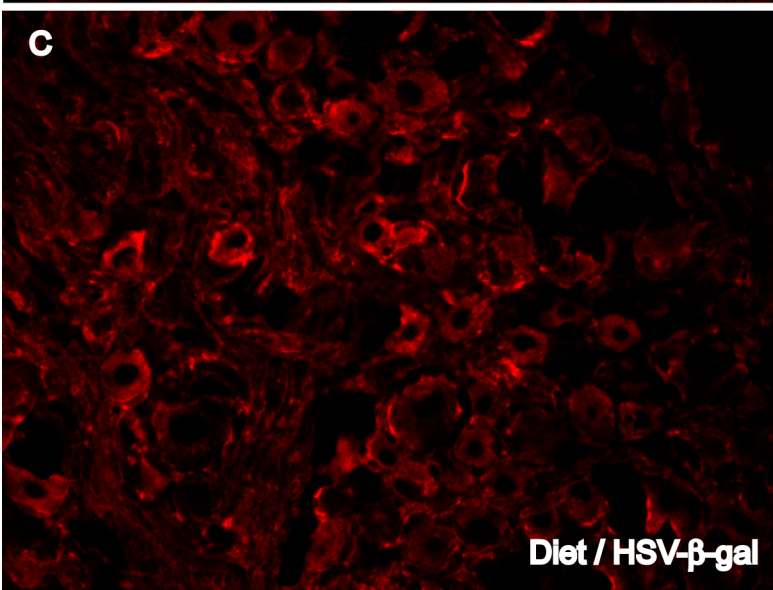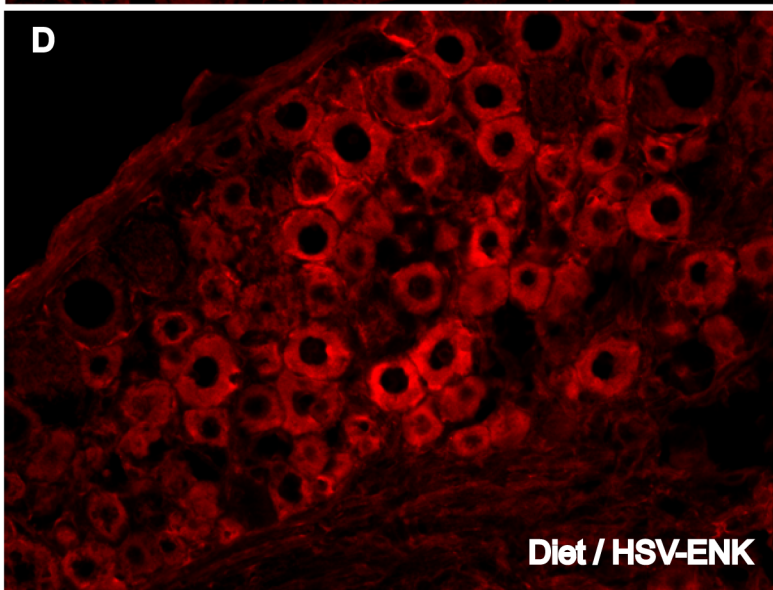

## **HSV-1 in DRG**

Supplement: MOESM8 [file 9612750]
